# Supplementary material
Source: HighWire-hosted journal article supplement (https://erj.ersjournals.com/content/57/2/2001836)
Supplement: inline-supplementary-material-1 [file inline-supplementary-material-1.pdf]

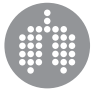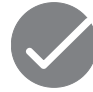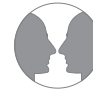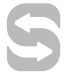

SHAREABLE PDF

# Instability of sputum molecular phenotypes in U-BIOPRED severe asthma

Nazanin Z. Kermani<sup>1</sup>, Stelios Pavlidis<sup>1,2</sup>, Jiaying Xie<sup>2</sup>, Kai Sun<sup>1</sup>, Matthew Loza<sup>3</sup>, Fred Baribaud<sup>3</sup>, Steve J. Fowler<sup>4</sup>, Dominic E. Shaw<sup>5</sup>, Louise J. Fleming<sup>2</sup>, Peter H. Howarth<sup>6</sup>, Ana R. Sousa<sup>7</sup>, Julie Corfield<sup>8,9</sup>, Charles Auffray<sup>10</sup>, Bertrand De Meulder<sup>10</sup>, Peter J. Sterk<sup>11</sup>, Yike Guo<sup>1</sup>, Mohib Uddin<sup>12</sup>, Ratko Djukanovic<sup>6</sup>, Ian M. Adcock<sup>1,2</sup> and Kian Fan Chung<sup>1,2</sup> on behalf of the U-BIOPRED study group

**Affiliations:** <sup>1</sup>Dept of Computing and Data Science Institute, Imperial College London, London, UK. <sup>2</sup>National Heart and Lung Institute, Imperial College London, and Biomedical Research Unit, Royal Brompton and Harefield NHS Trust, London, UK. <sup>3</sup>Janssen Research and Development, High Wycombe, UK. <sup>4</sup>Centre for Respiratory Medicine and Allergy, Institute of Inflammation and Repair, University of Manchester and University Hospital of South Manchester, Manchester, UK. <sup>5</sup>Respiratory Research Unit, University of Nottingham, Nottingham, UK. <sup>6</sup>NIHR Southampton Respiratory Biomedical Research Unit, Clinical and Experimental Sciences and Human Development and Health, Southampton, UK. <sup>7</sup>Respiratory Therapeutic Unit, GSK, Stockley Park, UK. <sup>8</sup>AstraZeneca R&D, Molndal, Sweden. <sup>9</sup>Areteva R&D, Nottingham, UK. <sup>10</sup>European Institute for Systems Biology and Medicine, CNRS-ENS-UCBL-INSERM, Lyon, France. <sup>11</sup>Amsterdam UMC, University of Amsterdam, Amsterdam, The Netherlands. <sup>12</sup>Respiratory Global Medicines Development, AstraZeneca, Gothenburg, Sweden.

**Correspondence:** Kian Fan Chung, National Heart and Lung Institute, Imperial College London, Dovehouse Street, London SW3 6LY, UK. E-mail: f.chung@imperial.ac.uk

 @ERSpublications

At 1 year, 45% of severe asthma change molecular phenotype as determined by sputum transcriptomic analysis. Together with concomitant shift in sputum granulocytic markers, this may indicate variability of driving mechanisms in this unstable group. <https://bit.ly/35aj489>

**Cite this article as:** Kermani NZ, Pavlidis S, Xie J, *et al.* Instability of sputum molecular phenotypes in U-BIOPRED severe asthma. *Eur Respir J* 2021; 57: 2001836 [<https://doi.org/10.1183/13993003.01836-2020>].

This single-page version can be shared freely online.

## To the Editor:

The Unbiased Biomarkers for the Prediction of Respiratory Disease Outcomes (U-BIOPRED) project has described phenotypic differences of severe asthma using a systems biology approach. We obtained three molecular phenotypes termed transcription-associated clusters (TACs) using hierarchical clustering of differentially expressed transcripts between T2-high and T2-low [1]. TAC1 was characterised by receptors IL33R, CCR3 and TSLPR, with the highest enrichment of gene signatures for IL-13/type-2 (T2) inflammation with sputum eosinophilia; TAC2 by inflammasome-associated genes, interferon- $\alpha$  (IFN- $\alpha$ ) and tumour necrosis factor- $\alpha$  (TNF- $\alpha$ )-associated genes with sputum neutrophilia; and TAC3 by metabolic and mitochondrial function genes with pauci-granulocytic inflammation. Given that sputum eosinophilia may vary with time in many asthmatic subjects [2, 3], we hypothesised that TAC status may also change with time.
